# Supplementary material
Source: Springer Nature journal article supplement (https://www.springermedizin.de/resource/supplementary/12894_2009_150_MOESM3_ESM.pdf/9513112)

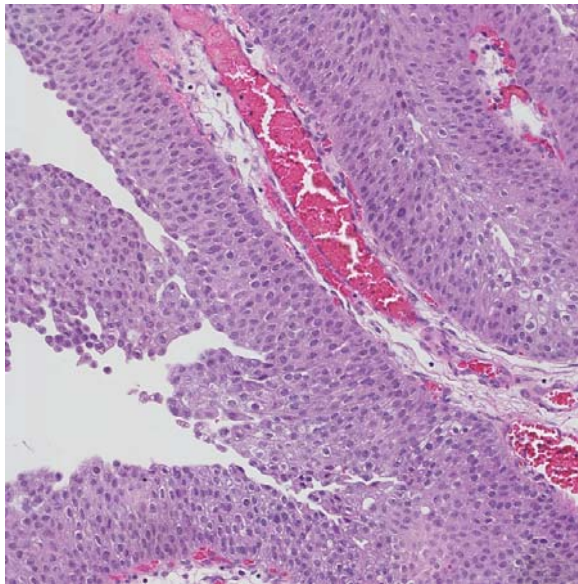

A

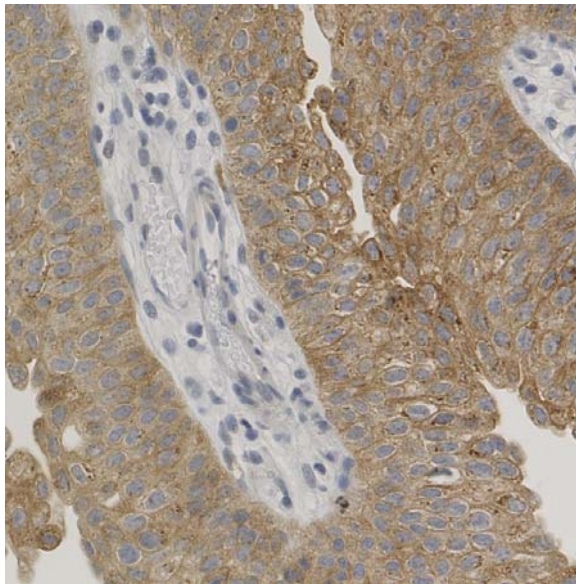

B

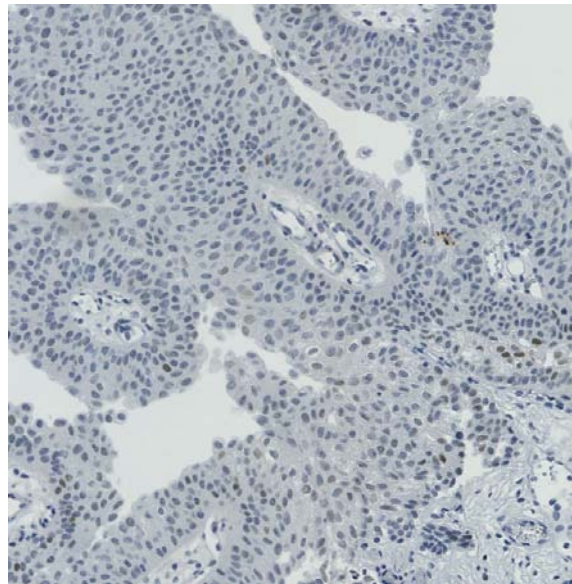

C

Supplement: MOESM3 [file 9513112]
